# Supplementary material for: Investigating the luminescence mechanism of Mn-doped CsPb(Br/Cl)3 nanocrystals
Source: Royal Society of Chemistry journal article supplement (doi:10.1039/c9nr00143c), 2019-01-01
Supplement: c9nr00143c1.pdf [file c9nr00143c1.pdf]

Supporting Information

## Investigating the Luminescence Mechanism of Mn-doped CsPb(Br/Cl)<sub>3</sub> Nanocrystals

Jinjin Ma<sup>1</sup>, Qianting Yao<sup>1</sup>, John A. McLeod<sup>1\*</sup>, Lo-Yueh Chang<sup>1,2</sup>, Chih-Wen Pao<sup>2</sup>, Jiatang Chen<sup>3</sup>,  
Tsun-Kong Sham<sup>3</sup> and Lijia Liu<sup>1\*</sup>

<sup>1</sup>Jiangsu Key Laboratory for Carbon-Based Functional Materials & Devices, Institute of Functional Nano and Soft Materials (FUNSOM), Joint International Research Laboratory of Carbon-Based Functional Materials and Devices, Soochow University, Suzhou, Jiangsu 215123 China

<sup>2</sup>National Synchrotron Radiation Research Center, 101 Hsin-Ann Road, Hsinchu 30076, Taiwan

<sup>3</sup>Department of Chemistry, and Soochow-Western Centre for Synchrotron Radiation Research University of Western Ontario, 1151 Richmond Street, London, ON, N6A5B7 Canada

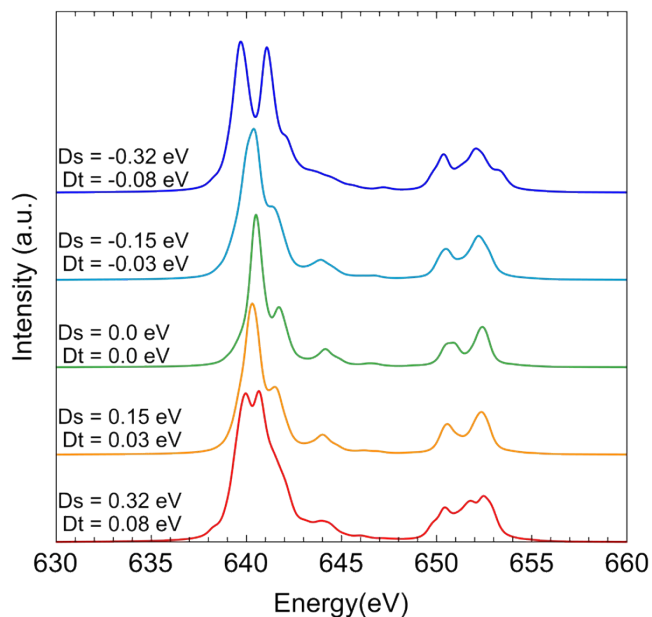

Figure S1. Calculated Mn  $L_{3,2}$ -edge XANES spectra from  $Mn^{2+}$  in a  $D_{4h}$  field. The  $10Dq$  parameter is fixed to 0.5 eV, the  $Dt$  and  $Ds$  parameters are labelled on the figure. When  $Dt = Ds = 0$  eV, an octahedral field is regained.  $D_{4h}$  symmetry occurs when octahedral bonding experiences Jahn-Teller distortion, i.e. when the bond length along the  $z$ -direction is longer or shorter than the bond lengths in  $x$ - and  $y$ -directions. When  $Dt, Ds > 0$  the  $z$ -direction bond is longer than the  $x, y$ -bonds, when  $Dt, Ds < 0$  the  $z$ -direction bond is shorter. These calculated spectra are used as a qualitative indication of what we may expect in a XANES measurement if the Mn local environment is distorted from octahedral symmetry.

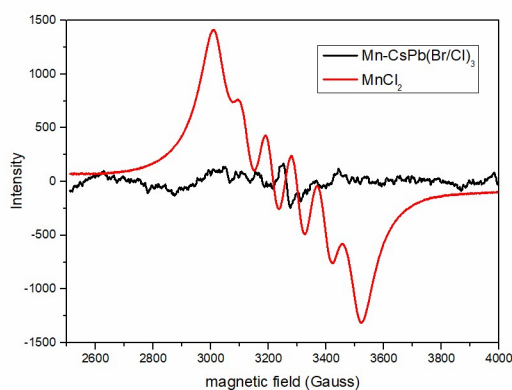

Figure S2. EPR spectra of Mn doped  $CsPb(Br/Cl)_3$  NCs and commercial  $MnCl_2$ .

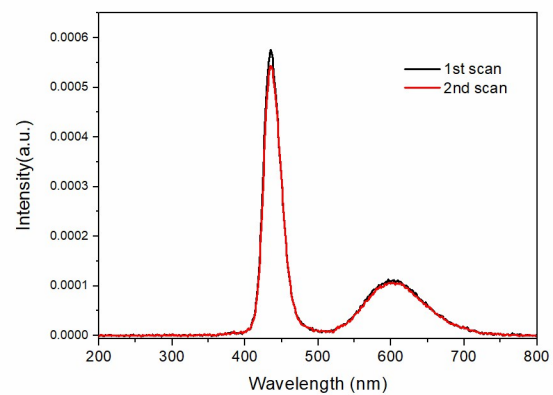

Figure S3. XEOL spectra of Mn-doped  $\text{CsPb}(\text{Br}/\text{Cl})_3$  acquired at  $E_{\text{ex}}=640$  eV on the same spot at the beginning of X-ray irradiation (1<sup>st</sup> scan) and after continuous X-ray irradiation for a duration of 3 min (2<sup>nd</sup> scan).

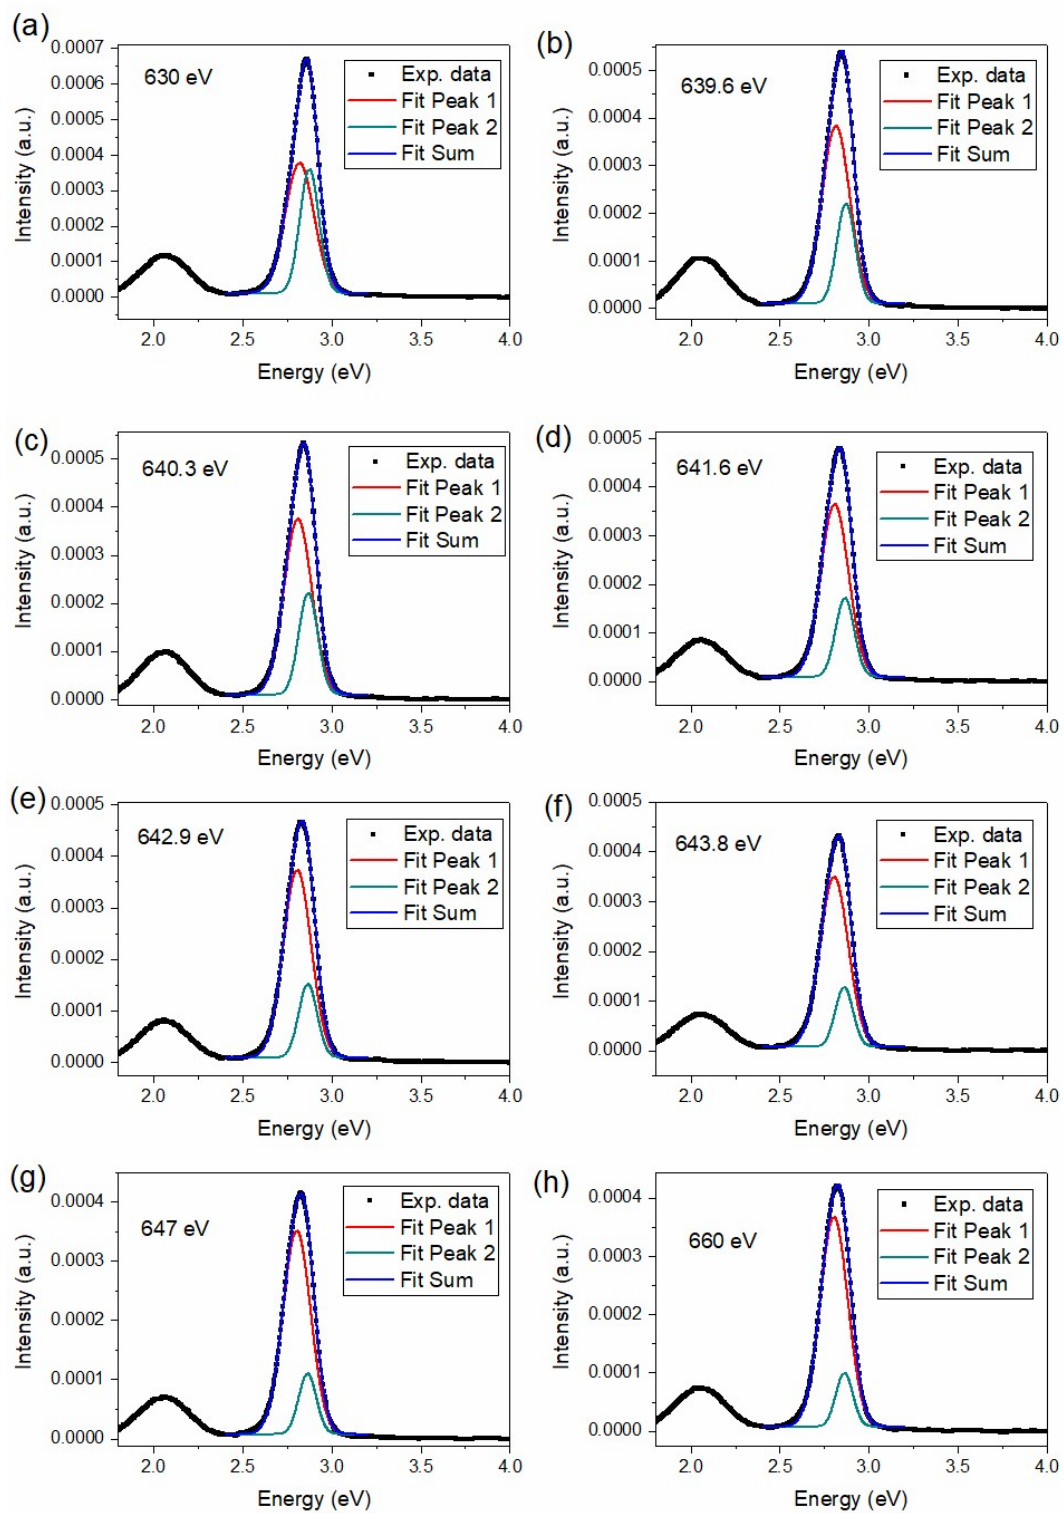

Figure S4. Fitting results of the blue emission in each XEOL spectrum.

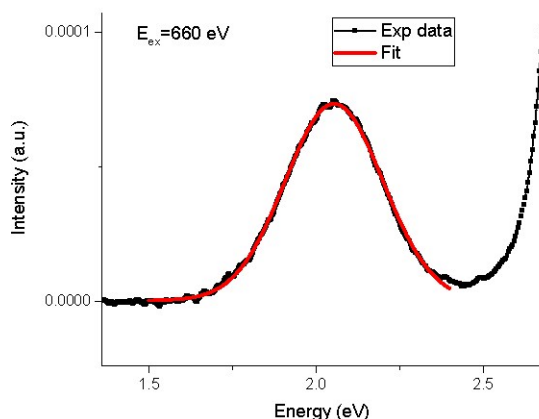

Figure S5. Fitting result of the orange emission in XEOL of Mn-doped CsPb(Br/Cl)<sub>3</sub> at  $E_{\text{ex}}=660$  eV.

### X-ray attenuation length calculation

X-ray attenuation length was calculated using the online X-ray attenuation length calculator ([http://henke.lbl.gov/optical\\_constants/atten2.html](http://henke.lbl.gov/optical_constants/atten2.html)). Three compounds were calculated, which are CsMnBr<sub>3</sub>, CsPbBr<sub>3</sub>, and the doped CsPbBr<sub>3</sub>, respectively. To obtain the values of attenuation length within a chosen excitation energy range, the densities of the compounds are required. For pure compounds, the densities were calculated based on their corresponding crystal structure. To mimic the doped perovskite, we start with a cubic CsPbBr<sub>3</sub> unit cell, expand it four times, and substitute one Pb with one Mn. It can be seen in Figure S4 that the two compounds containing Mn both exhibit a decrease in attenuation length at the Mn L<sub>3</sub>-edge threshold, but the change is much less significant in the doped perovskite. Note that the doped structure used in this calculation actually has a Mn concentration of 25%, further reduce the Mn concentration will make the difference below and above the Mn L<sub>3</sub>-edge nearly negligible.

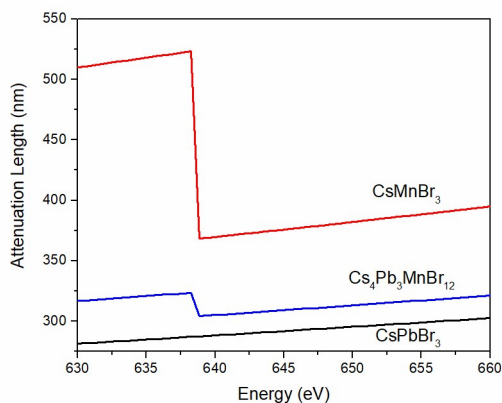

Figure S6. Comparison of attenuation lengths among CsMnBr<sub>3</sub>, CsPbBr<sub>3</sub>, and a CsPbBr<sub>3</sub>-like structure with Mn substitution.
